# Supplementary material
Source: Springer Nature journal article supplement (https://www.springermedizin.de/resource/supplementary/12916_2012_729_MOESM9_ESM.pdf/9598634)
Supplement: MOESM9 [file 9598634]

**Titles initially screened**  
n=3696

Excluded by title  
n=3295

**Abstracts**  
n=401

Excluded by abstract  
n=200

**Full-text papers**  
n=201

**Additional papers** from  
reference lists of retrieved  
papers  
n=27

**Full-text papers**  
n=228

Excluded by full-text n=156

- Not relevant n=79
- No data n=24
- Reporting only children n=43
- <50 patients n=6
- Duplicate data n=4

**Papers included in review**  
n=72
